# Supplementary material for: Composite organogels of graphene and activated carbon for electrochemical capacitors
Source: Royal Society of Chemistry journal article supplement (doi:10.1039/c3ta11438d), 2013-01-01
Supplement: c3ta11438d.pdf [file c3ta11438d.pdf]

Supporting Information for  
**Composite organogels of graphene and activated carbon for  
electrochemical capacitors**

Qinqin Zhou, Jian Gao, Chun Li, Ji Chen, Gaoquan Shi\*

*Department of Chemistry, Tsinghua University, Beijing 100084, People's Republic of*

*China, E-mail: gshi@tsinghua.edu.cn*

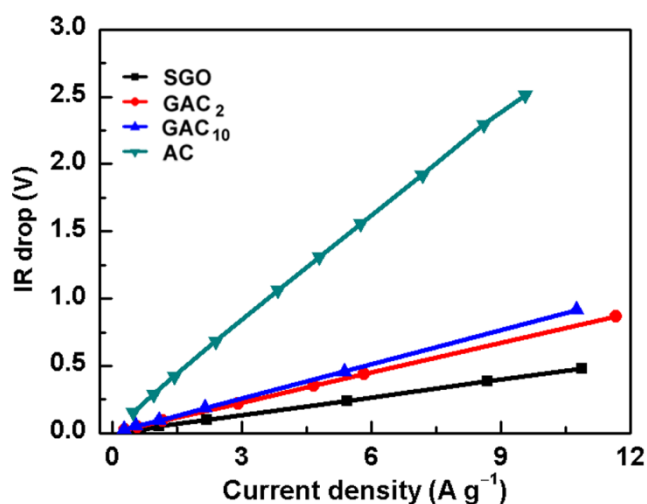

**Fig. S1** Plots of IR drops calculated from the discharge curves of ECs measured at different current densities.

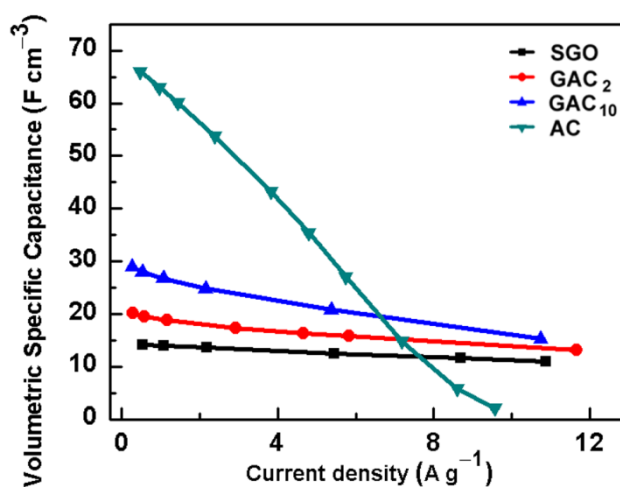

**Fig. S2** Plots of volumetric specific capacitances of ECs measured at different current densities.

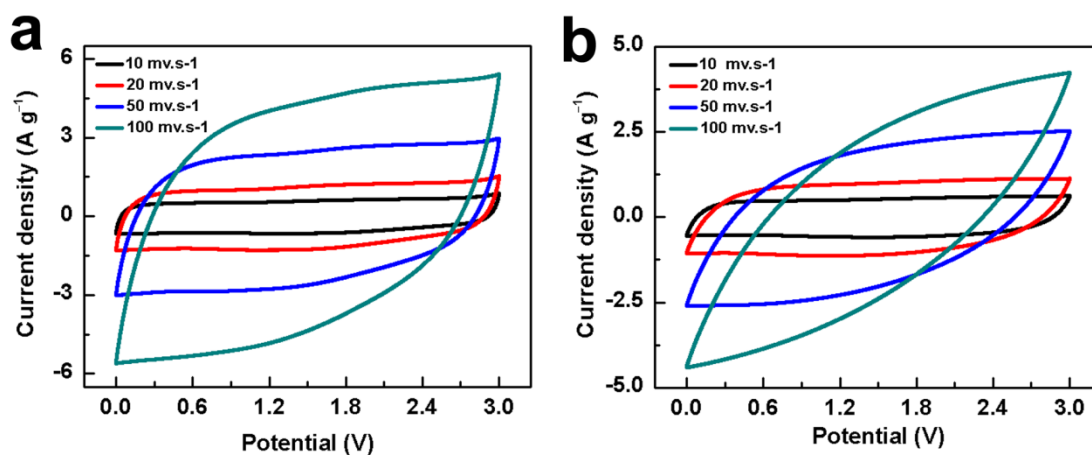

Fig. S3 CVs of a GAC<sub>10</sub>-based EC (a) and an AC-based EC (b) at different scan rates.

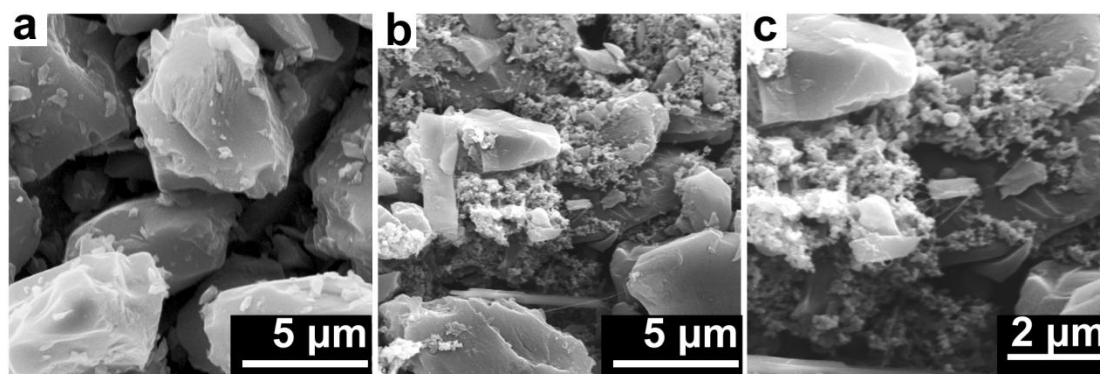

Fig. S4 SEM images of AC (a), and AC electrode at a low (b) or a high magnification (c).
